# Supplementary material
Source: publisher figshare collection journal article supplement (https://acs.figshare.com/ndownloader/files/17421860)
Supplement: Supplementary file 1 [file 17421860]

## Supporting Information

### *Alluaudite* $\text{NaCoFe}_2(\text{PO}_4)_3$ as a 2.9 V Cathode for Sodium-ion Batteries Exhibiting Bifunctional Electrocatalytic Activity

Debasmita Dwivedi, Ritambhara Gond and Prabeer Barpanda

Faraday Materials Laboratory, Materials Research Center, Indian Institute of Science, C. V. Raman Avenue, Bangalore, 560012, India.

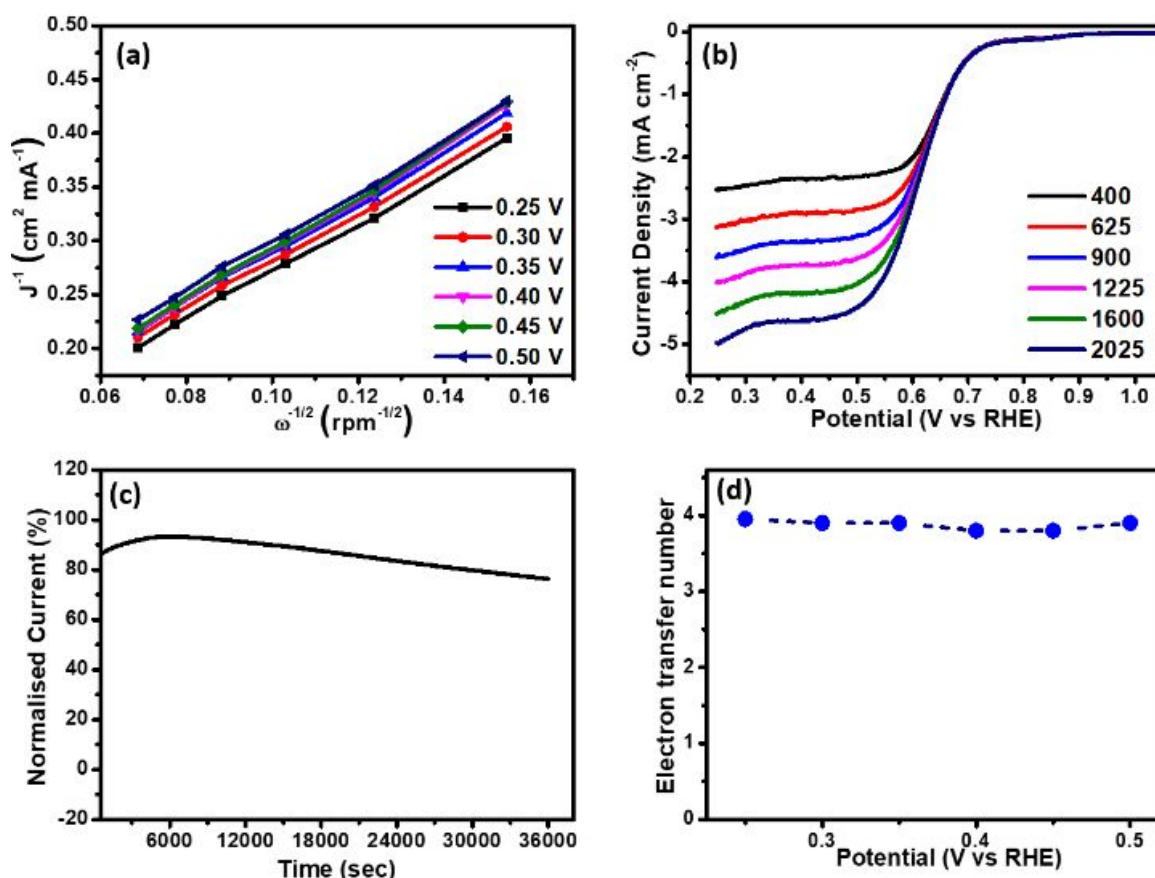

**Figure S1.** The electrocatalytic activity studied under Linear sweep voltammetry (LSV). (a) Koutecky-Levich plots ( $J^{-1}$  versus  $\omega^{-1/2}$ ,  $J$  is the current density in  $\text{mA cm}^{-2}$  and  $\omega$  is the rotating speed in  $\text{rpm}^{-1/2}$ ). (b) LSV for  $\text{NaCoFe}_2(\text{PO}_4)_3$  at different rotating speed in  $\text{O}_2$  saturated 0.1 M KOH electrolyte. (c) ORR stability performance of  $\text{NaCoFe}_2(\text{PO}_4)_3$  shown over 10 hours. (d) Number of electron transfer as calculated from K-L plot during the ORR process in potential window of 0.25 – 0.50 V.
